# Supplementary material for: Tracking and clarifying differential traits of classical- and atypical L-type bovine spongiform encephalopathy prions after transmission from cattle to cynomolgus monkeys
Source: PubMed Central journal article supplement (PMC6522098; doi:10.1371/journal.pone.0216807), 2019-05-16
Supplement: pone.0216807.s001.pdf [file pone.0216807.s001.pdf]

A

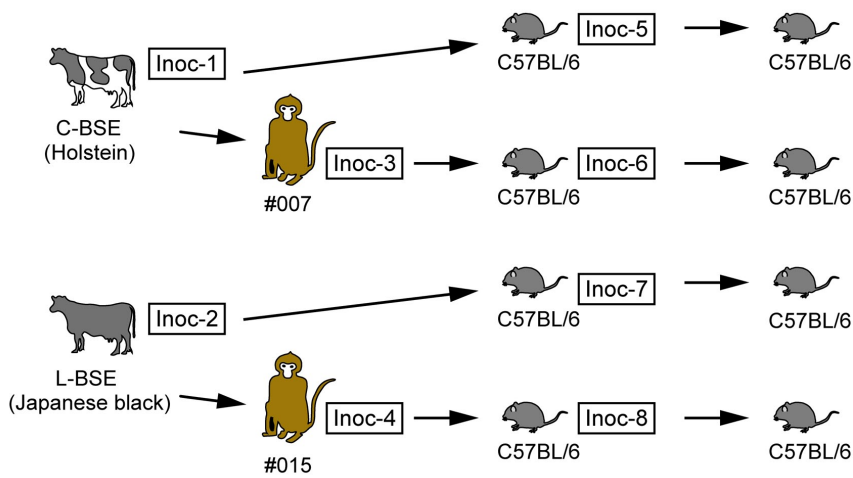

B

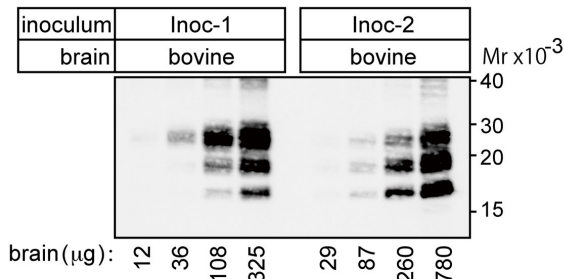

C

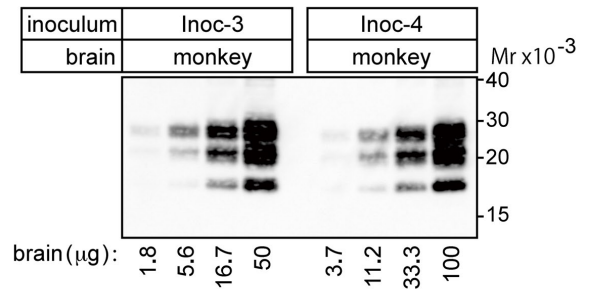

D

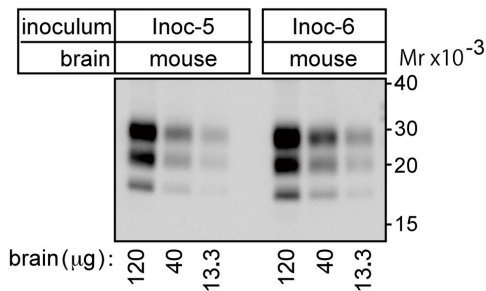

E

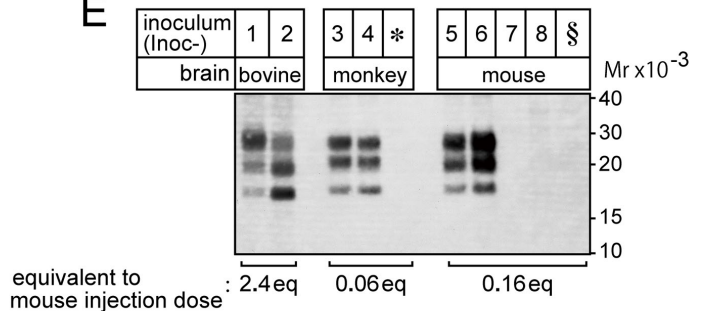

S1 Fig. Relative amounts of PrP<sup>Sc</sup> in inocula injected into C57BL/6 mice.

(A) Flow chart of bioassays using C57BL/6 mice. Eight types of inocula (Inoc-1 to -8) were prepared and injected into C57BL/6 mice. (B) Western blot analysis of homogenates of bovine brains from which Inoc-1 and -2 were prepared. Brain homogenates were digested by PK, and digests corresponding to indicated weights of brain tissue were analyzed by Western blot to estimate amounts of PrP<sup>Sc</sup>. (C) Homogenates of monkey brains used as sources of Inoc-3 and -4. Western blot analysis was carried out as in (B). (D) Homogenates of mouse brains used as sources of Inoc-5 and -6. Western blot analysis was carried out as in (B). (E) Comparison of relative amounts of PrP<sup>Sc</sup> in inocula. After digestion of inocula by PK, digest amounts equivalent to indicated mouse injection doses (Inoc-1 and -2, 2.4x-dose; Inoc-3 and -4, 0.06x-dose; Inoc-5, -6, -7 and -8, 0.16x-dose) were analyzed by Western blot. Comparable PrP<sup>Sc</sup> signal intensities were obtained for Inoc-1 through -6. PrP<sup>Sc</sup> was not detectable in Inoc-7 and -8. \*, brain homogenate of a healthy monkey (control). §; brain homogenate of a healthy mouse (control). Mr; relative molecular mass. The antibody SAF84 and VeriBlot anti-mouse IgG were used to detect PrP<sup>Sc</sup> in panels (B) to (E). Inoc-1, -2, -3, and -4 were also injected into SJL and RIIS mice in this study.
